# Supplementary material for: A comprehensive molecular interaction map of the budding yeast cell cycle
Source: PubMed Central journal article supplement — Mol Syst Biol. 2010 Sep 21;6:415. doi: 10.1038/msb.2010.73 (PMC2964125; doi:10.1038/msb.2010.73), 2010-09-21
Supplement: msb201073-s13.pdf [file msb201073-s13.pdf]

**TO REVIEW THE MAP ON PAYAO**

# ACCESS

Website: <http://sblab.celldesigner.org/Payao10/bin/>

Model names: Kaizu2010\_BuddingYeastCellCycle (Figure 1),  
Kaizu2010\_BuddingYeastCellCycle\_regulatory (Figure 3a)

The models have been assigned as “public” enabling the community to view and comment on tags without a username/password.

The default user account **payaouser** would enable users to add tags to the models.

Community users interested in customizing their own accounts and access the maps from their accounts, are requested to email [payaoinfo@sbi.jp](mailto:payaoinfo@sbi.jp) for registration.

# Navigating the map

Display on/off TagSets

Zoom in/out

Bird's Eye View

The screenshot displays the Payao beta web interface. On the left, a sidebar titled "Search Tags" contains a section for "sbi's Tag Sets" with checkboxes for "Notes", "MIRIAM", and "AnnotationLayer", each with a "readable" status. Below this are options for "Show Disabled Tags" and "Show Update Tags", along with a "monthly" dropdown and a "view statistics" button. The main area shows a biological map titled "Kaizu2010\_BuddingYeastCellCycle". A central information box for "Note\_sa840" provides details: "Created by: Information 2010-07-20", "Last updated: 2010-07-20", "KeyWords:", "PubMedID: 17267692", "OutLink:", "FreeText: YJL194W PMID: 17267692", and "Comment: 0". The map itself consists of various nodes (circles and rectangles) connected by lines, representing a complex biological pathway. A "Bird's Eye View" window is open on the right, showing a zoomed-in view of a specific section of the map. A red square box on the map indicates the area being viewed in the Bird's Eye View window. A red arrow points from the "Bird's Eye View" text above to the window. Another red arrow points from the "Zoom in/out" text to a magnifying glass icon in the toolbar. A third red arrow points from the "Display on/off TagSets" text to the "Add TagSet" button in the sidebar.

Drag the red square box  
To view the section of the map

Using Bird's Eye View to navigate through a large map.

# Search Tags

Payao beta English

Search Tags

YJL194W

Tag Comments Only Search

Advanced Search

Note\_sa840

Created by: Information 2010-07-20

Last updated: 2010-07-20

KeyWords:

PubMedID: [17267692](#)

OutLink:

FreeText:

YJL194W  
PMID: 17267692

Comment: 0

"Search Tag" function is available. You can search word in Tags as well as Comments from the "Search Tag" tabs on the left panel.

The Search Results will be displayed in the Tag Info section on the left panel automatically.

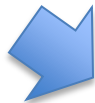

Payao beta English

Search Tags

Tag Sets

Tag Info

Notes AnnotationLayer SearchResult

Total: 12 tags

| TagTitle | Creator     | Update      | Comments No. | lastUpdateDate |            |
|----------|-------------|-------------|--------------|----------------|------------|
| 100      | Note_sa842  | Information | 07/20/2010   | 0              | 07/20/2010 |
| 101      | Note_sa841  | Information | 07/20/2010   | 0              | 07/20/2010 |
| 102      | Note_sa840  | Information | 07/20/2010   | 0              | 07/20/2010 |
| 103      | Note_sa2584 | Information | 07/20/2010   | 0              | 07/20/2010 |
| 104      | Note_sa2708 | Information | 07/20/2010   | 0              | 07/20/2010 |
| 105      | Note_sa31   | Information | 07/20/2010   | 0              | 07/20/2010 |
| 106      | Note_sa175  | Information | 07/20/2010   | 0              | 07/20/2010 |
| 107      | Note_sa2373 | Information | 07/20/2010   | 0              | 07/20/2010 |
| 108      | Note_sa2530 | Information | 07/20/2010   | 0              | 07/20/2010 |
| 1098     | Note_sa855  | Information | 07/20/2010   | 0              | 07/20/2010 |
| 1099     | Note_sa854  | Information | 07/20/2010   | 0              | 07/20/2010 |
| 1090     | Note_sa864  | Information | 07/20/2010   | 0              | 07/20/2010 |
